# Supplementary material
Source: PubMed Central journal article supplement (PMC2488290)
Supplement: E08-04-0359_2.pdf [file E08-04-0359_2.pdf]

**Supplemental Table S1. Target genes common to E2F and AHR**

| <b>GENE</b>          | <b>PROPERTIES</b>                                                                                                                                                                                                                                                                                                                                                                                                                                                                                                                                                                                                                                                                                                                                                                                                                          |
|----------------------|--------------------------------------------------------------------------------------------------------------------------------------------------------------------------------------------------------------------------------------------------------------------------------------------------------------------------------------------------------------------------------------------------------------------------------------------------------------------------------------------------------------------------------------------------------------------------------------------------------------------------------------------------------------------------------------------------------------------------------------------------------------------------------------------------------------------------------------------|
| <b>APAF1-Apaf1</b>   | Guo Z, Yikang S, Yoshida H, Mak TW, Zacksenhaus E.; Inactivation of the retinoblastoma tumor suppressor induces apoptosis protease-activating factor-1 dependent and independent apoptotic pathways during embryogenesis. <i>Cancer Res.</i> 2001 Dec 1;61(23):8395-400. <b>Apaf-1 plays a critical role in apoptosis in a subset of tissues and that both E2F1:p53:Apaf-1-dependent and -independent apoptotic pathways operate downstream of Rb.</b>                                                                                                                                                                                                                                                                                                                                                                                     |
| <b>CDCA7-Cdca7</b>   | Cell division cycle associated 7. This gene was identified as a c-Myc responsive gene, and behaves as a direct c-Myc target gene. Overexpression of this gene is found to enhance the transformation of lymphoblastoid cells, and it complements a transformation-defective Myc Box II mutant, suggesting its involvement in c-Myc-mediated cell transformation.                                                                                                                                                                                                                                                                                                                                                                                                                                                                           |
| <b>RAM2-BC006933</b> | Cell division cycle associated 7-like. Transcription factor RAM2.                                                                                                                                                                                                                                                                                                                                                                                                                                                                                                                                                                                                                                                                                                                                                                          |
| <b>CDT1-Ris2</b>     | Cdt1 function is negatively regulated by the Cdk phosphorylation independent of geminin binding. Sugimoto N, Tatsumi Y, Tsurumi T, Matsukage A, Kiyono T, Nishitani H, Fujita M. Cdt1 phosphorylation by cyclin A-dependent kinases negatively regulates its function without affecting geminin binding. <i>J Biol Chem.</i> 2004 May 7;279(19):19691-7. <b>Cdt1, together with origin recognition complex and CDC6 proteins, constitutes the machinery that loads the minichromosome maintenance complex, a candidate replicative helicase, onto chromatin during the G(1) phase. a Skp2-independent pathway that requires the N-terminal 32 residues of Cdt1 is critical for the degradation of Cdt1 in S phase- this degradation is necessary for the optimum progression of cells through S phase. human CDT1 is essential for DNA</b> |
| <b>CKS1B-Cks1</b>    | Cks1b (suc1) interacts with Cdc2.<br>Cdkn1b (p27) interacts with Cks1b (suc1).<br>CKS1B protein binds to the catalytic subunit of the cyclin dependent kinases and is essential for their biological function.                                                                                                                                                                                                                                                                                                                                                                                                                                                                                                                                                                                                                             |
| <b>DNMT1-Dnmt1</b>   | DNA (cytosine-5-)-methyltransferase 1 has a role in the establishment and regulation of tissue-specific patterns of methylated cytosine residues. Aberrant methylation patterns are associated with certain human tumors and developmental abnormalities. Direct role of Dnmt1 in the restoration of epigenetic information during DNA repair. DNMT1 plays a key role in methylation maintenance. DNA methylation is tightly coupled to replication through physical interaction of DNMT1 and core components of the replication machinery. reduction in DNMT1 triggers intra-S-phase arrest of DNA replication proposed to protect the genome from extensive DNA demethylation.                                                                                                                                                           |
| <b>EZH2-Ezh2</b>     | This gene encodes a member of the Polycomb-group (PcG) family. PcG family members form multimeric protein complexes, which are involved in maintaining the transcriptional repressive state of genes over successive cell generations. The findings of this study indicate that EZH2 mRNA expression was upregulated in human HCC and may play an important role in tumour progression, especially by facilitating portal vein invasion.                                                                                                                                                                                                                                                                                                                                                                                                   |
| <b>HMGN1-Hmgn1</b>   | HMGN1, a nuclear protein that binds to nucleosomes and reduces the compaction of the chromatin fiber, modulates histone posttranslational modifications. Chromosomal protein HMG14 and its close analog HMG17 (MIM 163910) bind to the inner side of the nucleosomal DNA, potentially altering the interaction between the DNA and the histone octamer. The 2 proteins may be involved in the process that maintains transcribable genes in a unique chromatin conformation. Their ubiquitous distribution and relative abundance, as well as the high evolutionary conservation of the DNA-binding domain of the HMG14 family of proteins, suggest that they may be involved in an important cellular function.                                                                                                                           |

|                    |                                                                                                                                                                                                                                                                                                                                                                                                                                                                                                                                                                                                                                                 |
|--------------------|-------------------------------------------------------------------------------------------------------------------------------------------------------------------------------------------------------------------------------------------------------------------------------------------------------------------------------------------------------------------------------------------------------------------------------------------------------------------------------------------------------------------------------------------------------------------------------------------------------------------------------------------------|
| <b>HNRPR-Hnrpr</b> | This gene belongs to the subfamily of ubiquitously expressed heterogeneous nuclear ribonucleoproteins (hnRNPs). The hnRNPs are RNA binding proteins and they complex with heterogeneous nuclear RNA (hnRNA). These proteins are associated with pre-mRNAs in the nucleus and appear to influence pre-mRNA processing and other aspects of mRNA metabolism and transport.                                                                                                                                                                                                                                                                        |
| <b>IGF2R-Igf2r</b> | CD222 is a 250kDa transmembrane protein with a short cytoplasmic tail containing an internalization signal. CD222 was originally identified as a receptor for IGFII and M6P-containing proteins (e.g. lysosomal hydrolases). CD222 is also a receptor for TGFbeta latency associated peptide (LAP), proliferin and may bind several molecules independently of M6P, including plasminogen, CD87 or retinoic acid. It is involved in activation of latent TGFbeta                                                                                                                                                                                |
| <b>MCM3-Mcm3</b>   | The protein encoded by this gene is one of the highly conserved mini-chromosome maintenance proteins (MCM) that are involved in the initiation of eukaryotic genome replication. The hexameric protein complex formed by MCM proteins is a key component of the pre-replication complex (pre_RC) and may be involved in the formation of replication forks and in the                                                                                                                                                                                                                                                                           |
| <b>NASP-Nasp</b>   | In the cytoplasm linker histones are bound to a complex containing NASP and HSP90 whose ATPase activity is stimulated by binding NASP. Overexpression affects progression through cell cycle. This gene encodes a H1 histone binding protein that is involved in transporting histones into the nucleus of dividing cells.                                                                                                                                                                                                                                                                                                                      |
| <b>NES-Nes</b>     | Nestin-expressing cells, marked by GFP fluorescence in nestin-GFP transgenic mice, appear in the permanent upper hair follicle immediately below the sebaceous glands. Nestin expression is recognized under all conditions of vascular development. Nestin expression in tumor endothelium is enhanced by the first intron. Detection of nestin-positive keratinocytes in the basal layer of cultured epidermis                                                                                                                                                                                                                                |
| <b>PLTP-Pltp</b>   | plasma. The encoded protein transfers phospholipids from triglyceride-rich lipoproteins to high density lipoprotein (HDL). In addition to regulating the size of HDL particles, this protein may be involved in cholesterol metabolism. The phospholipid transfer protein gene is a liver X receptor target expressed by macrophages in atherosclerotic lesions. Pltp is regulated by liver X receptors in mice. PLTP regulates the bioavailability of vitamin E in atherogenic lipoproteins and suggest a novel strategy for achieving more effective concentrations of anti-oxidants in lipoproteins, independent of dietary supplementation. |
| <b>TFDP1-Tfdp1</b> | cell cycle. E2F factors bind to DNA as homodimers or heterodimers in association with dimerization partner DP1. TFDP1 may be the first example of a family of related transcription factors. DP-1alpha is a novel isoform of DP-1 that acts as a                                                                                                                                                                                                                                                                                                                                                                                                |
| <b>TMPO-Tmpo</b>   | Thymopoietin. Data suggest that hypophosphorylated Rb is anchored in the nucleus by the interaction of pocket C with LAP2alpha (Tmpo)-lamin A/C complexes                                                                                                                                                                                                                                                                                                                                                                                                                                                                                       |

## Supplemental Table S2

Canonical E2F and AHR binding sites in the -5000 to +1 bp promoter regions of cell cycle-regulated genes

| Gene Name  | Accession Number |           | Mouse        |          |           | Human    |           |
|------------|------------------|-----------|--------------|----------|-----------|----------|-----------|
|            | Mouse            | Human     | Binding Site | Position | Sequence  | Position | Sequence  |
| Dnmt1      | NM_010066        | NM_001379 | AHR          | -3554    | CACGCC    | -2363    | CACGCC    |
|            |                  |           |              | -2961    | GGCGTG    | -1886    | GGCGTG    |
|            |                  |           |              | -1514    | TGCGTG    | -1133    | GGCGTG    |
| E2F        |                  |           |              | -3065    | TTTGGGGC  | -2980    | TTTGACAC  |
|            |                  |           |              | +16      | TTCCGCGC  | +179     | TTCCGCGC  |
| Apaf1      | NM_009684        | NM_013229 | AHR          | -1985    | CATGCA    | -2813    | CAAGCA    |
|            |                  |           |              | -207     | CGCGCA    | -309     | CGCGCA    |
| E2F        |                  |           |              | -467     | TTTCCTGC  | -681     | CTTCCCGC  |
|            |                  |           |              | -424     | TTGGGCC   | -635     | TTGGGCC   |
|            |                  |           |              | -208     | GCGCGCAG  | -310     | GCGCGCAG  |
| Tfdp1      | NM_009361        | NM_007111 | AHR          | -221     | CACGCG    | -230     | CACGCG    |
|            |                  |           |              | -215     | CACGCG    | -224     | CACGCG    |
|            |                  |           |              | -39      | CACGCG    | -34      | CACGCG    |
| E2F        |                  |           |              | -161     | GCGGGAGA  | -153     | GCGGGAGA  |
|            |                  |           |              | -121     | GCGCCGAA  | -116     | GCGCCGAA  |
|            |                  |           |              | -112     | GCGCGAAA  | -107     | GCGCGAAA  |
| Cdt1       | NM_026014        | NM_030928 | AHR          | -2804    | CGCGTG    | -2197    | CGCGTG    |
|            |                  |           |              | -241     | CACGCC    | -161     | CACGCC    |
|            |                  |           |              | -268     | CACGCG    | -220     | CACGCG    |
|            |                  |           |              | -478     | TGCGTG    | -406     | AGCGTG    |
| E2F        |                  |           |              | -1293    | GCTGCAAA  | -1193    | TTTCTCGC  |
|            |                  |           |              | -323     | GCGCCAAG  | -201     | GCGCTAAA  |
|            |                  |           |              | -15      | CCGCGAAA  | -16      | TTTGGCGG  |
| Cdca7      | NM_025866        | NM_031942 | AHR          | -249     | CGCGCA    | -202     | CGCGCA    |
|            |                  |           | E2F          | -270     | TTTCGCGC  | -224     | TTTCGCGC  |
|            |                  |           |              | -60      | GCGGGAAA  | -13      | GCGGGAAA  |
| Cks1       | NM_016904        | NM_001826 | AHR          | -1587    | CACGAG    | -1972    | CACGCC    |
|            |                  |           | E2F          | -4717    | CTTCCCAC  | -4586    | CCGCCACC  |
|            |                  |           |              | -3046    | AAGCCAAA  | -3190    | ATGCCAAA  |
|            |                  |           |              | -2957    | TTTAGCAT  | -3125    | TTTTTCAC  |
| Ezh2       | NM_007971        | NM_004456 | AHR          | -172     | CACGCG    | -152     | CACGCG    |
|            |                  |           |              | -61      | CGCTTG    | -22      | CGCTTG    |
| E2F        |                  |           |              | -394     | ATTCCC GC | -393     | GTTCCC GC |
|            |                  |           |              | -390     | CCGCCAAG  | -389     | CCGCCAAG  |
|            |                  |           |              | -361     | GTTCCC GC | -349     | GTTCCC GC |
| Nasp       | NM_016777        | NM_172164 | AHR          | -133     | CAAGCG    | -551     | CAAGCG    |
|            |                  |           | E2F          | -593     | TTTCCAGC  | -1458    | TTTCACTC  |
|            |                  |           |              | -130     | GCGCGATA  | -549     | GCGCGGTA  |
| Hmgn1      | NM_008251        | NM_004965 | AHR          | -297     | CACGTG    | -1196    | TGCCTG    |
|            |                  |           |              | -274     | CGCGCA    | -225     | CCC GTG   |
| E2F        |                  |           |              | -275     | GCGCGCAG  | -1779    | GAGCAAAA  |
|            |                  |           |              | -249     | GCTTCAAA  | -1690    | CTGCCAAA  |
| Mcm3       | NM_008563        | NM_002388 | AHR          | -4349    | CACGCT    | -3865    | CACGCC    |
|            |                  |           |              | -3865    | GGCGTG    | -3478    | GGCGTG    |
| E2F        |                  |           |              | -14      | TTTGGCGC  | -132     | TTTCCC GC |
|            |                  |           |              | -10      | GCGCCAAG  | -108     | GCGGAAAA  |
| Pltp       | NM_011125        | NM_006227 | AHR          | -89      | GGCTTG    | -175     | GGCTTG    |
|            |                  |           | E2F          | -19      | GCCCCCAA  | -94      | GCCCCCAA  |
| Cdca7-like | BC006933         | NM_018719 | E2F          | -1768    | CTGAGAAA  | -1722    | CAGCCAAA  |
|            |                  |           |              | -154     | GCTACACA  | -257     | GCTCCACT  |

**Supplemental Table S3. PCR primer sets to amplify discrete domains of the mouse *Apaf1* promoter**

| RefSeq            | GeneID and coordinates    | Forward primer | Sequence               | Tm   | Reverse Primer | Sequence               | Tm   | Position (Relative to TSS) | Amplicon size |
|-------------------|---------------------------|----------------|------------------------|------|----------------|------------------------|------|----------------------------|---------------|
| <b>NM_009684</b>  | 11783:-:90641224:90641573 | For90641224    | CAGCGGTGTTTGAGTGCTC    | 60.6 | Rev90641224    | ACACCCCTCTCACACCCTTC   | 61.4 | 22                         | 100           |
| <b>Gene name</b>  | 11783:-:90641574:90641923 | For90641574    | TCTTTCGGCTCTTCACTTCG   | 60.6 | Rev90641574    | CCCTCCAAGCCATCCTG      | 61.6 | -328                       | 69            |
| <b>Apaf1</b>      | 11783:-:90641924:90642273 | For90641924    | GCAAACCTTGAGCGTGCACT   | 60   | Rev90641924    | CTCCTGTCGCTGCCCTCTAA   | 62.9 | -678                       | 93            |
| <b>Location</b>   | 11783:-:90642274:90642623 | For90642274    | GCATTTATCGCTCAGCAACA   | 60   | Rev90642274    | GCTTTGCGGATGAGTTTGCT   | 62.7 | -1028                      | 100           |
| <b>10 48.0 cM</b> | 11783:-:90642624:90642973 | For90642624    | TTTCAAAGCTACAAATGTTGAG | 55   | Rev90642624    | GTATGACACATACAACCCAGCT | 56.6 | -1378                      | 97            |
|                   | 11783:-:90642974:90643323 | For90642974    | CTCAAGGACTCAGGGTGCA    | 58.8 | Rev90642974    | TGGATATCCTCCAGGGTAGAG  | 58.1 | -1728                      | 80            |
|                   | 11783:-:90643324:90643673 | For90643324    | ACTCAGTAATATCTTTCCCAA  | 52.5 | Rev90643324    | TGTGTTGGATTTGCTGTTTT   | 56.7 | -2078                      | 108           |
|                   | 11783:-:90643674:90644023 | For90643674    | AGTGGATTATGAGGCTTTGTCT | 57   | Rev90643674    | CACCAGGGCTTAATACAAGTGG | 60.8 | -2428                      | 83            |
|                   | 11783:-:90644024:90644373 | For90644024    | CACTTTGGAGAGACAAAGCTCA | 59.7 | Rev90644024    | TTGTGCTTCATCTTAGGGATT  | 57.9 | -2778                      | 110           |
|                   | 11783:-:90644374:90644723 | For90644374    | AAGACAACAATGGAACAGTCTT | 41.5 | Rev90644374    | ATATATTTGGAGTTATTTAA   | 41.5 | -3128                      | 98            |
|                   | 11783:-:90644724:90645073 | For90644724    | ACATATTTTGGAGTAAATAAG  | 55.5 | Rev90644724    | TGCAGGTTTAGAAGGGAGGC   | 61.6 | -3478                      | 89            |
|                   | 11783:-:90645074:90645423 | For90645074    | TTGTTAAAAGAGCTTTTGAGGA | 56.1 | Rev90645074    | TACAGAGGGCAAGCACTTTC   | 58.1 | -3828                      | 63            |
|                   | 11783:-:90645424:90645773 | For90645424    | AAGATTATAGAGGGGGCTGG   | 58.6 | Rev90645424    | TCAGAGCTTTCTCTCATCCA   | 59.3 | -4178                      | 88            |
|                   | 11783:-:90645774:90646123 | For90645774    | CAGGAAGCAGTTATGGTCCA   | 58.7 | Rev90645774    | CAGTGTTCCCTTCAACATTAGG | 58.6 | -4528                      | 102           |
|                   | 11783:-:90646124:90646473 | For90646124    | GGGAGCCCATTTGGTAACAA   | 62   | Rev90646124    | CCTGTGTATAGTGAAGAAGGC  | 58.9 | -4878                      | 108           |

**Supplemental Table S4. Gene-specific primer sets for real-time PCR analysis of relative mRNA expression levels**

| Gene Name      | Accession Number | Forward Primer (5'-3')   | Reverse Primer (5'-3') | Product Size |
|----------------|------------------|--------------------------|------------------------|--------------|
| $\beta$ -actin | M12481           | catccgtaaagacctctatgcc   | acgcagctcagtaacagtcc   | 287          |
| Cyp1a1         | NM_009992        | gtgtctggttactttgacaagtgg | aacatggacatgcaaggaca   | 199          |
| Apaf1          | NM_009684        | tcagcaaacgagaggaaaag     | cataggggggagaagtccacag | 235          |
| Cdca7          | NM_025866        | aagaggaggaggaagaggag     | ggtcggattatatgcggaag   | 142          |
| Cdca7-like     | NM_146040        | tgcttccgttccaaatacttc    | cctcctcttcatcatcttcttc | 202          |
| Cks1           | NM_016904        | caaatacgacgacgaggag      | tcagaaagatggcaggag     | 277          |
| Dnmt1          | NM_010066        | ctgaccgcttctacttcttc     | tccctttccccttcccttcc   | 111          |
| Ezh2           | NM_007971        | aagacaccacctaaacgcc      | accactccactccacattc    | 273          |
| Hmgn1          | NM_008251        | agataaaaggaagaggggag     | ttaaaaaatgggatgaggtggg | 289          |
| Mcm3           | NM_008563        | gcaggaagaatgaaaagagg     | aggaagcaggaagtgagag    | 199          |
| Nasp           | NM_016777        | atgctcctgctccttctacc     | cccaacactccattctccattc | 252          |
| p73(common)    | NM_011642        | tcacagagacagagagccac     | atgagcgcacttcccttcag   | 152          |
| TAp73          | NM_011642        | tcttctcctcctccacctt      | ccttgcaggtggaagacat    | 143          |
| Pltp           | NM_011125        | agaccatcaccatcccagac     | gccccatcatataagaaccag  | 203          |
| Ris2 (Cdt1)    | NM_026014        | tccttgctggttcttctcatc    | gccatccaacataccctactc  | 184          |
| Tfdp1          | NM_009361        | ttagaggtggagaggcagag     | ttgacaatgatgaagggaag   | 182          |
